# Supplementary material
Source: PubMed Central journal article supplement (PMC2851989)
Supplement: 1000928107_sfig02.pdf [file 1000928107_sfig02.pdf]

**(A) BshA**

```
BS -----MRKLRIGITCYPSVGGSGIIATELGKQLAEKGHEIHFITSSIPFRLN--- 47
BA -----MKLKIGITCYPSVGGSGVVGTELKQLAERGHEIHFITSGLPFRLN--- 46
BC -----MEKLRIGISCYPTVGGSGVVATELGKQLASRGHEVHFITTEIPFRLD--D 48
DR MGSAAVGGPRPHLYFPAMSFPSASVASTLGPKI AVLCHTGAGSGVVATELGKLVADAGHEVHFVGTAMPFRLTGH- 79
MX MNAP-----LNVAITCFPTFGSGMVATEIGLAMADRGHRVHFIAARDLPVRLHGA- 50
SA -----MGKRMKIGITCYPSMGGSGIIATELGKIKLAERGHEVHFITSNIPFRLR--- 48

BS TYHPNIHFHEVEVNOYAVFKYP-PYDLTLASKIAEVAERENLDI IHAHYALPHAVCAYLAKQMLK-RNIGIVTTLHGTDI 125
BA KVYPNIYFHEVTVNQYSVFQYP-PYDLALASKMAEVAQRENLDILHVHYAIPHAICAYLAKQMTG-ERIKIVTTLHGTDI 124
BC KVYPNIFFHQVEVNOYAVFKHP-PHDLASAASKIAEVILTHDLDLLHVHYAVPHAICAILAREMSG-KDIKIMTTLHGTDI 126
DR QGLRGPYFHQVGGFAYALFEQP-FPELSAANTLSEVILEHGVDLTHAHYAIPHASAALHARSITG--KTRVLTTLHGTDV 156
MX N--RKVV FHEVTESDY PALQQSGTYPIALASKMIEVASYERLDILHVHYAVPHATAAWMAREVLGHKAPRVVTTLHGTDI 128
SA KPLPNMIFHQVEVNOYAVFQYP-PYDITLSTKIAEVIKEYDLDLLHMHYAVPHACGILAREMSG-KDIKIMTTLHGTDI 126

BS TVLGYDPSLKDLIRFAIESSDRVTA VSSALAAET YDLIKPEK--KIETIYNFID-ERVYLKKNNTAAIKEKHGIL-PDEKV 201
BA TVLGS DPSLNLIREFGIEQSDVVTAVSHSLINETHELVKPNK--DIQTVYNFID-ERVYFKRDMTQLKKEYGIS-ESEKI 200
BC TVLGFEP SLRPLIRY GIEQSDIVTAVSYDLARQTNELVRTDK--PIQTVYNFID-EQVYYPKQVEQLRACYGLS-ETDDI 202
DR TLVGTEPAFQHTTRHAIERSDHVTAVSHSLAAETREVFVDR--DIEVIHNFVDSDRFRRIIPD-PGVRARFAHP--EEAL 231
MX TLVGIDPSYLPITRFSITRSDAVTVPSAYLRRATWRGFDIPESVPIDVIANFVD TARYAPVRDRACLALFPALRDHEPV 208
SA TVLGYDHS LQGAIKFGIEKSDIVTSVSKSLAQETHETHEI IETNK--EIIPIYNEFVR-ENEFPTKHNTALKSQFGIA-PDEKV 202

BS VIHVS NFRKVKRVQDVIRVFRNIAGKTKAKLLLVGDGPEKSTACELIRKYGLEDOVLM LGNQDRVEDLYSISDLKLLLSE 281
BA LIHIS NFRKVKRVQDVVQAFKIVTEVDKLLLVGDGPEFCTILQLVKNLHIEDRVLFLGKQDNVAELLAMSDLM LLLSE 280
BC I I H I S N F R P V K R I M D V L K T F Q L I V K S R D A K L L L I G N G P E L P I A R Q F V E E N D L T N D V L M L G N Q K H V A E L L S M S D L M L L L S E 282
DR I V H V S N F R P I K R V E D V V Q V F A R I A S E I P A R L L M I G D G P E R A R A F E L A R E L G V I G R T Q F L G S F P D V Q T V L G I S D L F L L T S S 311
MX L I H V S N F R P V K R I T D V A I F T E V H R H R P C R L V M V G D G P E R S P A E R M L R E M G L E G R V A F L G K Q D R F E E L V A A S D V F L L P S E 288
SA L I H V S N F R Q V K R I D T I I E T F A K V R E K I P S K L I L L G D G P E L V P M R Q L T K E L N V E E D V L F L G K Q D C V S E F Y Q L S D I V L L L S E 282

BS KESFGLV LLEAMACGVP CIGTNI GGIPEVIKNNVSGFLVDVGDVTAATARAMSILEDEQLSNRFTKAAIEMLENEFSSKK 361
BA KESFGLV LLEAMACGVP CIGTRVGGIPEVIQHGD TGYLCEVGD TTVGADQAIQLLKDEELHRNMGERARES VYEQFRSEK 360
BC KESFGLV ALEAMACGVPVIATNIGGIPEVVEDEETGYLCSLGNIEEAAAKAISLLAD DQKRQAFKRAALNRVKQSEFDSQH 362
DR HESFGLA ALEAMSCEVPVVASNAGGIPEVVOHGVNGLSDVGDVDDMAHHALKILRDQETYQQMGQAARRTAVEQFHPRL 391
MX QESFGLA ALEALS CGIPVVASDLGGIPELVTHGETGFLAPLGDVPAMARHVLT LVEDAERWQGFSHRARAQVLERFQKEP 368
SA KESFGLT LLEAMKTGVVPIGSNAGGIKEVIKHGETGFVVVDVGD CDSASDYAIRLLEDKVLYNKLQKNMLADIAERFGSEL 362
```

BS IVSQYEQIYADLAEPE----- 377  
 BA IVSQYETIYDVLRRDDKNGKI- 381  
 BC IVSQYEHLYEAMLKEEPL---- 380  
 DR IVPOYLAAVRRLAEQSASTF-- 411  
 MX AIDRYEALYRRLLTGPLRR--- 387  
 SA ITDQYEYYQKMLNEHNKSKGE 384

**(B) BshB1 and BshB2**

BS BshB1 -----MYNADVLAFGAHSDDVEIGMGGTIAKFKVQEKVMICDLTEAEL-----SSNGT 49  
 BS BshB2 -----MKEHVLVILPHPDDESYGVAGLIAALNRKKDIPVITYACATLGEMGRNMGDPFFANRETL 58  
 BA BA1557 -----MSGHLILAFGAHADDDVEIGMAGTIAKYTKQGYEVGICDLTEADL-----SSNGT 49  
 BA BA3524 -----MERHVLVVFPHPDDEAFAAGGTIRLLTDQGVVPTYACGTLGOMGRNMGKNVFANRETI 58  
 BA BA3888 -----MKNERHVLIVFPHPDDESYCVAGTILAYTQRNVPLTYVCLTLGEMGRAMGNPPFATRESL 60  
 BC BshB1 -----MAETVDILACGAHPDDIEIGMGGTVATYIQKGYNVAFLLTLAEL-----SSNGD 50  
 BC BshB2 -----MKKQSHVLVIFPHPDDEAFGVSGTISAYIDAGTPVITYACLTGOMGRNLGNPPFATRESL 60  
 SA BshB1 -----MTDERHVLVIFPHPDDETFSSAGTIASVQRGVPTYACLTGOMGRNLGNPPFATRESL 60  
 MX BshB1 -----MSANGTAYGIDVLAFGPHPDDELFCGGLLASMAARGYRTGIVDLTRGEK-----SSRGT 55  
 DR BshB1 MPTTLQTVYGEAQPLDWLCLAPHPDDAEIGAGGTLIRLAQAGRAVGILELTRGEK-----GTQGT 60  
 DR BshB2 ----MTSSSTPAPRATLLVIFAHPDDEAFSVGGTLTHYARQGVVVLAQATRGEACKITVPG--MTVDDL 64

BS BshB1 VSLRKKEAAEAARILGADKRIQLTLPD----RGL-IMSDQAIR-----SIVTVIRICRPKAVFM 103  
 BS BshB2 PLLRKQELINACKEMDINDLRMLGLRD----KTLEFEDDEYLAD-----IMEEIIDVKPSLIVT 114  
 BA BA1557 IELRKKEAKAAARIMGVKTRLNLAMPD----RGL-YMKEYYIR-----EIVKVIRTYKPKLVFA 103  
 BA BA3524 PNIREKELKDACVAMGIQDLRMLGFHD----KTLEFEDVDFVAD-----KIEAIIQEVNPSRIIT 114  
 BA BA3888 YAIREKELKRATNILGIKDLRMMGYRD----KTLEFETPGELRR-----VIQKVEELNPSLVIS 116  
 BC BshB1 IASRQQEAKAAAEQLGVRARYQLELPD----RGLTYIGEEKLE-----EVVDIIRLTRPTLVFM 105  
 BC BshB2 ADIRRKELQQAAMVGI TDLRMMGYRD----KTLEFEQPGRLKQ-----MVLDLVAELKPSLVIS 116  
 SA BshB1 PSIRERELEEACKVIGITDLRKMGLRD----KTVEFEPYEHIDS-----MIKSLIDDTNPSLIIS 116  
 MX BshB1 LQSRAEETEAAATRALGLAHRENLELPD----GWLNPWAGFDTPPEPERARTAAVARVVEALRRLRPELVV 121  
 DR BshB1 PAERQAE CVAAARLMDLSWRGQLGLPD----GELADTPPPFAH-----ALAAALRTVRPRVLV 114  
 DR BshB2 GAQREQELREACRALEIEPPVFLDYHDSGRYERTRHDDPTALMNVN--PLDAEVKLRALIEDVQEQVIVT 132

BS BshB1 PY-KKDR-HPDHGNAAALVEEAIIFSAGIHKYKDEKSLPAHKVSKVYYMINGFHQP----- 157  
 BS BshB2 FYPGHGV-HPDHDACGEAVIRALYRKKKED-----RPTICMAITRNREEVLGEA----- 163  
 BA BA1557 PY-YEDR-HPDHANCAKIVEEAIIFSAGIRKYMPE--VPPHRVESFYHYMINGFHKP----- 155  
 BA BA3524 FYPEHGV-HPDHDVAFGRAVVRVSRMSTEE-----RPVIHAVAITKNREAVLGEPE----- 163  
 BA BA3888 FYPGYAV-HPDHDATGEAVAEALATIPENK-----RPTFYAVAFANNHEAEIGPE----- 165

BC BshB1 P--AADR-HPDHGQCGALIKEAIFNAGIRRYGNG---EPHKVKAAYSIFYNGFAKP----- 155  
 BC BshB2 FYPGYAV-HPDHDATGLAVASALAE LPKSE-----RPTFYAVAFSNNHEKEIGPA----- 165  
 SA BshB1 FYPGYAV-HPDHEATADAVIRTVRMPKEE-----RRLTLVAFSNDATEALGEP----- 165  
 MX BshB1 PW-EQER-HPDHEAASALVTRALFFAGVRFDAEPAAEPFTPRQVLYYPMRHLTEP----- 175  
 DR BshB1 PH-WHDR-HPDHFGTYHLTKRAIHLAALKKADLG--GDPWRVQRVLLYQNSDISA----- 166  
 DR BshB2 FDPHGAYGHVDHLQMHRAIVAAFFSTGHLPSGGP---QRLYYTAMTHQAAAQISRLGHDQSLDPLVYGV 199

BS BshB1 ----DFVIDISDTIEAKKQSLNAYKSFIPSKDSVSTP-LTNGYIEIVEAREKLYGKEAGVEYAEVSFPN 222  
 BS BshB2 ----DVVLDIKEVADIKMNALRAHRTQTEG-----MLRELEEKLNNEPVMATWFEFEIYWTYQWND--- 221  
 BA BA1557 ----NFCIDISEYVSQKVEALEAYESQFSTGSDGVKTP-LTEGYVETVVAREKMFGEVGVLYAEGFMSK 220  
 BA BA3524 ----DVVNNISEVFEHKLAALGAHRSQTEA-----MLEETHAKIKNKDAATLKWLQLEQFWTYKWE---- 220  
 BA BA3888 ----HVKNEVKEYVPPKLEALQAHASQFAT-----KVTE LKREYEDGVETVWEWLEREPFWIYPFKDKNK 226  
 BC BshB1 ----DFVVDVTDNHSAKVAALQAYKSFVAQG-GVQTP-LTDGYIEAVIARDRLFGEVGVVALAEGFVAE 219  
 BC BshB2 ----DIVHDVSAYAIRKLDTLRAHASQLAW-----TLPSLEKAYYDGVVEAKERLCNERFWTYPFPA---- 222  
 SA BshB1 ----DIQNDITDFKDLKIKAFEAHASQTGP-----FLKQLASPEIDGKQHS--FLTVEPYWTYHFKS--- 221  
 MX BshB1 ----SVIVDVSAVYERKLA AVHCYASQVLP RPDPPTLVGSPLSVSSLEARDRFHGAQIGVTHGEPYILR 241  
 DR BshB1 ----NVLVDIGSVMTEWEAAIRAHTSQFAG---GYVSETVTPPEI IERRQGR LTYWGTLLRVKYAEPFEAE 229  
 DR BshB2 DSTLAVTMDVGAYAENKKAALAAHGTMGETSLMGR LSPDERAALEERMLGKESFSIGGTRTAIREYPLR 269

BS BshB1 -----GC----- 224  
 BS BshB2 ----- 221  
 BA BA1557 KPVL LHADLIGGCK----- 234  
 BA BA3524 ----- 220  
 BA BA3888 ----- 226  
 BC BshB1 KP-LVMANLLEGCGR----- 233  
 BC BshB2 ----- 222  
 SA BshB1 ----- 221  
 MX BshB1 EALGLADPLDHFRNSFAKPLFFPSRT 268  
 DR BshB1 EPL-LLDPLGL----- 239  
 DR BshB2 GLFDG VGV EGLV----- 281

(C) BshC

BS -----MQLTELSIKNQNVFVQHYIDGKEEMSSFFDYSIHHKDMWRERLEDLSSRFF-A 52  
BA BA4058 -----MEIKEISVP-QQGVVADYMNKGKEIQSCFDY-MLTEDAFKQRVQDLREREF-F 50  
BC -----MRFEALDTRRLTGFLAEYVNQPDQCSDFESYRWKTNGWEQERSEDLAKRSFSH 53  
MX MHRFRWRARRDLLSRHAVTSPFSTAWLRGDASALSFLPDDYRHREARARAVAAAASRAV-- 58  
SA -----MCKVVSINEKQDFIPKIKSSDPVITGLFOYDAAQQISFEKR---MSKENNGR 50

BS REELAAYLTSYHNKFGS-SAMQSAIEKLDKDPSSAAVVGQQAGLLTGPLYTIHKIISIIIV 111  
BA BA4058 RQDLVTHLLEYNTKLOAGEATIQNKALGDENTYVVLGQQAGLLTGPLYTIHKIISVLQ 110  
BC RQALCRLEEARHAPLRKREACMDNIHKLKQENALVVVAGQQAGLMTGPLYTAYKAMSVIL 113  
MX SPALLDVLGAQNARLAPSPARERNLLAKPGTVAVVTGQQMGLFLGPLYTLYKAASAIV 118  
SA EAALANVIREYMNDLKLSSQEQLNIQHLAN-GSKVVIGQQAGLFGGPLYTFHKIFSIIIT 109

BS LAKQQEKEIQVPIPIFWVAGEDHDLDEINRVHTSEENG---PVKKKLPQSYWKKSSAAS 168  
BA BA4058 LAKEKEESLGVKVVVFWIAGEDHDMDEINHFTVTKNKK---IKKTIFHDRNPKKASASE 167  
BC LAKQYEATLNQPVVPLFWIAGEDHDLDEVRYVHYLKGDM---WKKLMLGDE-PNGEAAS 169  
MX TARALQEETGRPCVPVFWLQTEDHDLPEIDHCVIPRPGGGPCRLALELPDAATSRAPIAH 178  
SA LSKELTDTHKQQVVPVFWIAGEDHDFDEVNHTFVYNEHG-SLHKVKYHTMEMPETTVSR 168

BS TSLDQEKCAAWIDDVFAAFEETDHTNTLLDNVRCLEESVTFDFFELLIADLQEEGLV 228  
BA BA4058 SELSLEDCKRWIEEIFKTYPETNFTKDVLFQIDDSLRSNTYVDFFGHLIMKMFVNSGLI 227  
BC KVLPPKELDTFLAKLFASLPETSNTLTKAMVTQAAATAGTYTEFFKLLMHELPHYREGLL 229  
MX RHLG-PSVLPALATLRAELEAEPAEEFLSLLERAYRPEATLAGAFTDVLSSLEFADEGLV 237  
SA YYPDKAELKQTLKTMETIRMKETVHTQGLLEICDRIIDQYDSWTDMEKALLHETFKAYGVL 228

BS LLNSGDPGIKKLETAMFQKILRENDELARAVSDQAFMRQAGYKPIIESGKEQANLFYEY 288  
BA BA4058 LVDSHHPERLKLKLEVPFFKQIVSKYKEVQEGHNNQORVIKELGYKPIIETKSNVHIFMEI 287  
BC FLDSNDPELRATERPFFKQIRKVDALQEQAAAGEARFVEKGYPSPIATEKQNAHLFYTL 289  
MX FLDPRDARLAPLAAPVHRFALQEQAGALSSVLAARAEALTRAGYTVQVHVRPGSPLSEFSP 297  
SA FIDAQFEPERLKMEMPFFKILKKHQLLDDAFRATQKRTQNGQLKAMIQTDN-VHLELHD 287

BS EDE---RFLIE---KDNGRFVIKELDLGWTRDELHTHMEEHPERFSNNVVTRPLMQEFLI 342  
BA BA4058 DNE---RVLLE---DNQGFVKGKDGYSFSYKELIEEMERSPERFSNNVVTRPLMQEYVF 341  
BC DGK---RRRLD---YEAGRFYVRETERQFTKEELLAEVDSHPQRFSSNNVVTRPLMQEWLL 343  
MX DALDGPYRRLDPAEADAWSLVGHPESSAITQDALHAALEREPLRFTTSALLRPLLQDTWL 357  
SA ENM---RQLVS---YDGKHFRLNKTDKKYIKEELINIAENQPELFSNNVVTRPLMEWLF 341

BS PTLAFLAGPGEINYNWGEIKQAFVVMGFKMPPVMPRLNITILERHTEKFLAERNISLQDAI 402  
 BA BA4058 PTLAFIGGPGELAYWSELQQVFHTIGFRMPPVVPRIITITYIERDIATDLHDLQLQESDPF 401  
 BC PTLAFVAGPGELAYWATLKDVFALFDYKLTPIIPRLSATFVPCRVEKHLRERKEAAETI 403  
 MX PTAAAYVGGPGELAYFAQLAPLYAHAGRPMLAIPRARFRVLDDRRARWLKGVGLQPDEVN 417  
 SA NTVAFIGGPSEIKYWAEIKDVFELFDVEMPIVMPRLRITYLNDRIEKLKSKYNIPIEKVL 401

BS ERGTENQRETYFERQIPEEFTAVMDQAKSQIEAIIHKTVRQEALKV---DQSLEPLLLKNA 459  
 BA BA4058 FNNVDKLRNWLNSNOIEEPIDERFVEAKKEIIDIHKSLQQFVKKI---DPGLSAFAGKNE 458  
 BC LGEGEKLEKEAWLASOHSYPVAQRAQAAEAIEAAHLPFRELAGEI---SPTLKKMGKNR 460  
 MX VPR-DALLTRLATRDAPESLETPEALEARLFGAFASELERVAGQVSAVDANLQDALRRTQ 476  
 SA VDGVEGERSKFIREQASDQFIEKVEGMIEQQRRLYQDLLDEVAGN---QNNINLVNKNNE 458

BS AFIQDQQLQFLERTVMKRIEEKEGYVLKDYERIQNSIKPLLAPQERIWNIMYYLNRYGPKF 519  
 BA BA4058 FKINEQIELLERMLKRNVEKKHEVELNKFRIQFALRPLGAPQERVWNVCYLNOFGLDF 518  
 BC AFIQGGQIAFLKERMEREIREQHQVGLSKYDEAMTWLHPKDAPQERILHSFILLNTAGIDI 520  
 MX GTVRVAVSRLTGRYRRALARADATAAAEQVDRLRTEFLFPEDAPQERILGLPYFACRIGTRA 536  
 SA IHIQQDYDLLKRYLLN-IERENDISMKQFREIQETLHPMGGLOERIWNPLQILNDFGTDV 517

BS FTT-FKNLPFSFQNOHQVVKL 539  
 BA BA4058 VDR-VMEKPFSSWNGKHHVIKL 538  
 BC FSR-LLEKKPPHTGAHLVIFYV 540  
 MX FTKRVLDACVPFSGDSKDLTP 557  
 SA FKP-STYPPLSYTFDHIIP 537

D. Percent Identity/Similarity for BshA, BshB1, BshB2 and BshC orthologs. Structures shown are from the PDB as indicated by the PDB Identification number.

|                                                                                                                                                                                                                 | Identity/similarity                                                      | Structure                                                                                   |
|-----------------------------------------------------------------------------------------------------------------------------------------------------------------------------------------------------------------|--------------------------------------------------------------------------|---------------------------------------------------------------------------------------------|
| <b>BshA</b><br><i>B. anthracis</i> (BA1558)<br><i>B. cereus</i> (ABC2070)<br><i>S. aureus</i> (SAR1469)<br><i>D. radiodurans</i> (DR_1555)<br><i>M. xanthus</i> (MXAN_6195)                                     | 63.9/79.5<br>56.1/76.3<br>54.4/73.4<br>38.9/59.6<br>41.1/62.3            | 2JJM<br>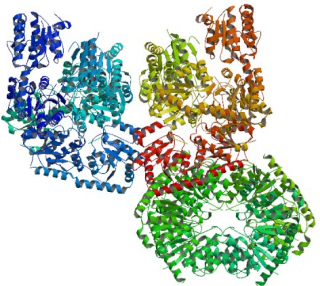 |
| <b>BshB1</b><br><i>B. anthracis</i> (BA1557)<br><i>B. cereus</i> (ABC2071)<br><i>S. aureus</i> (SALG_02510)<br><i>D. radiodurans</i> (DR_2363a)<br><i>M. xanthus</i> (MXAN_6194)                                | 58.1/70.1<br>48.7/66.1<br>22.2//41.5<br>29.9/46<br>31.4/48.5             | 2IXD<br> |
| <b>BshB2</b><br><i>B. anthracis</i> (BA3524)<br><i>B. anthracis</i> (BA3888)<br><i>B. cereus</i> (ABC2104)<br><i>S. aureus</i> (SALG_02510)<br><i>D. radiodurans</i> (DR_0450)<br><i>M. xanthus</i> (MXAN_6194) | 56.6/72.9<br>43.4/62.4<br>45.7/64<br>47.5/69.7<br>26.4/39.9<br>21.1/35.8 |                                                                                             |
| <b>BshC</b><br><i>B. anthracis</i> (BA4058)<br><i>B. cereus</i> (ABC2366)<br><i>S. aureus</i> (SALG_01369)<br><i>D. radiodurans</i> (DR_1647)<br><i>M. xanthus</i> (MXAN_6193)                                  | 40.8/63.2<br>36.7/57.2<br>32/53.1<br>18.4/32.7<br>24.7/45.6              |                                                                                             |
