# Supplementary material
Source: PubMed Central journal article supplement (PMC2851989)

**(A)**

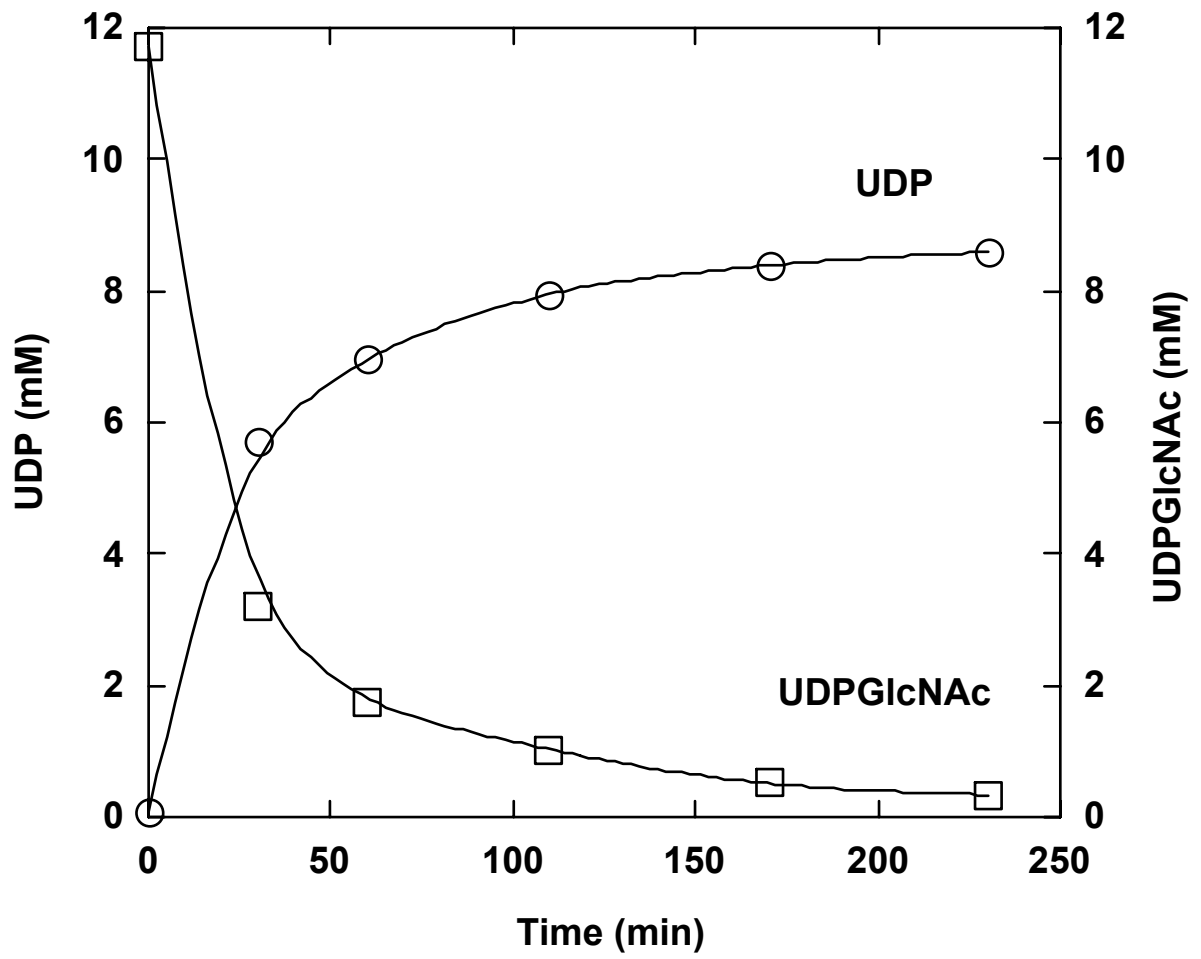

(B)

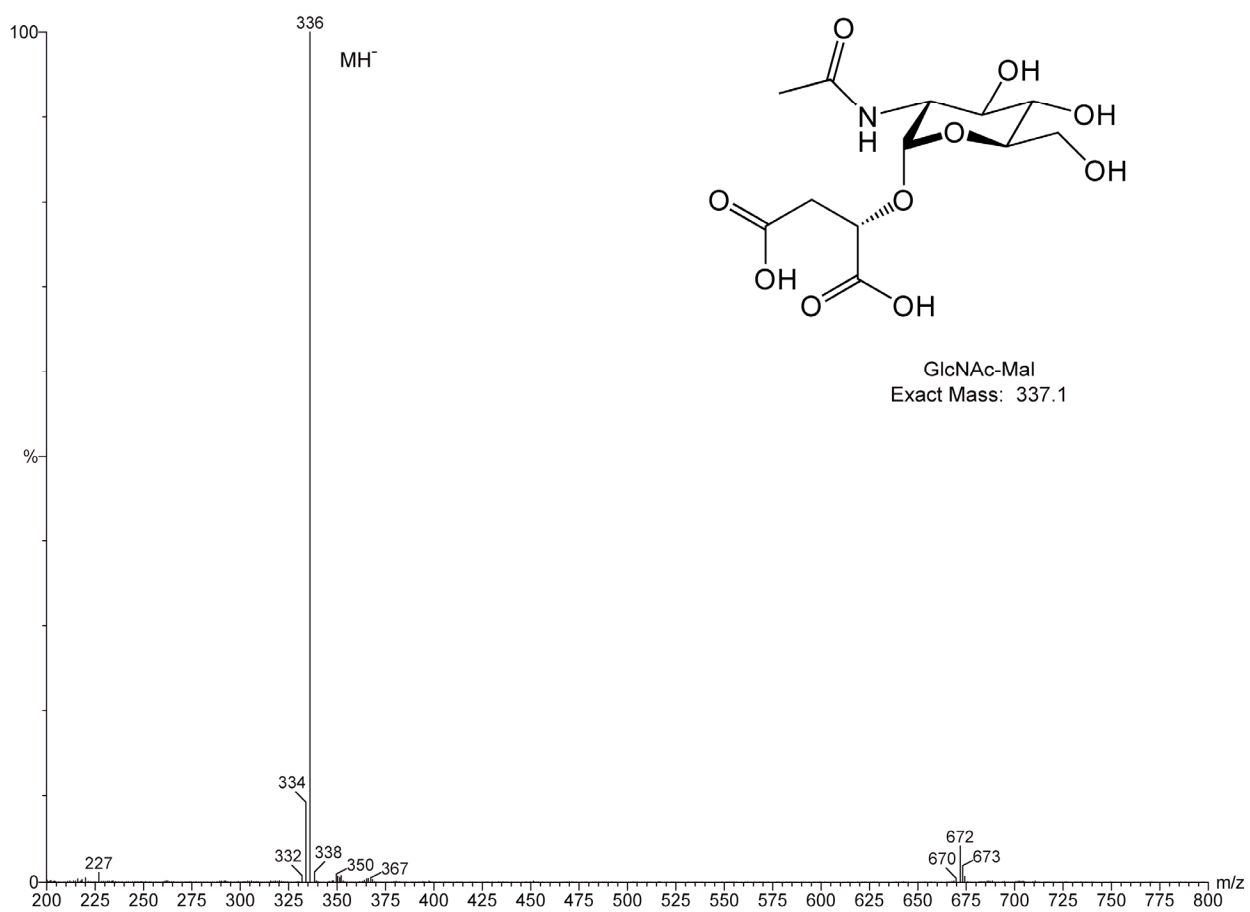

(C)

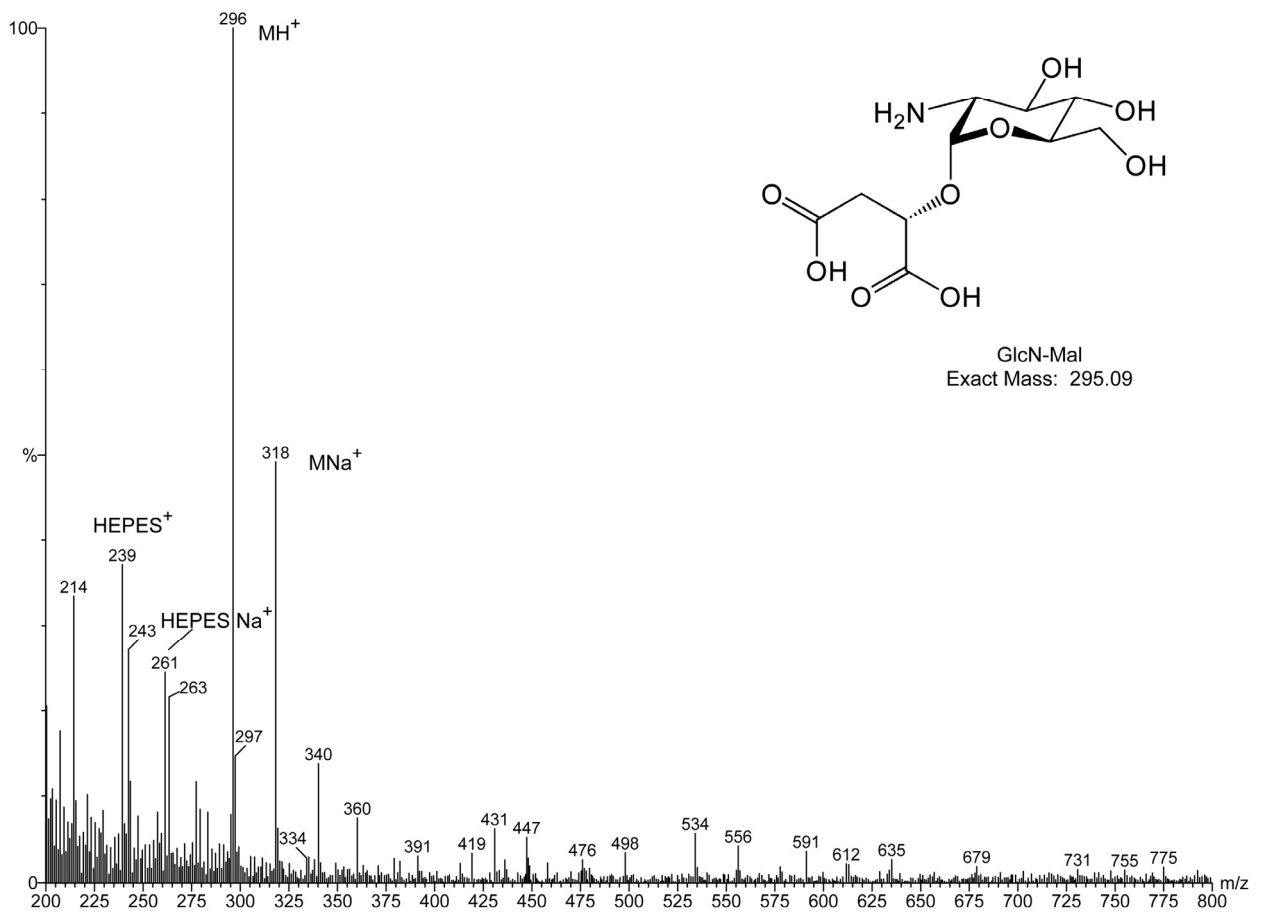

Supplement: 1000928107_sfig01.pdf [file 1000928107_sfig01.pdf]

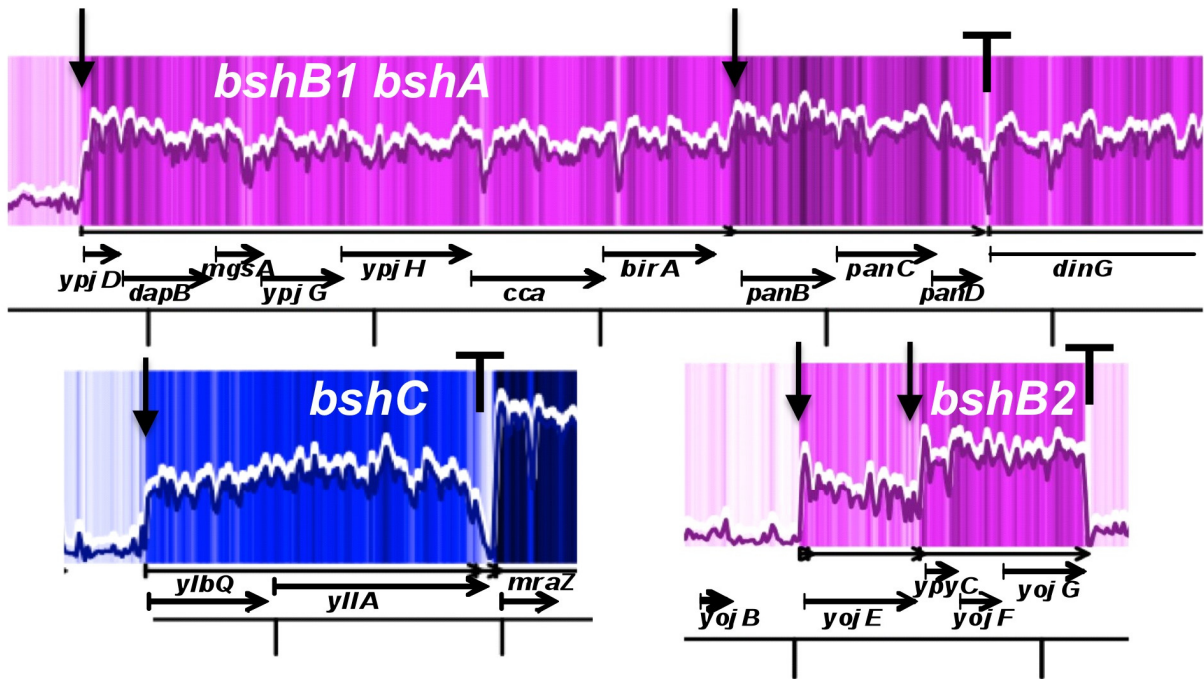

Supplement: 1000928107_sfig03.pdf [file 1000928107_sfig03.pdf]

(A)

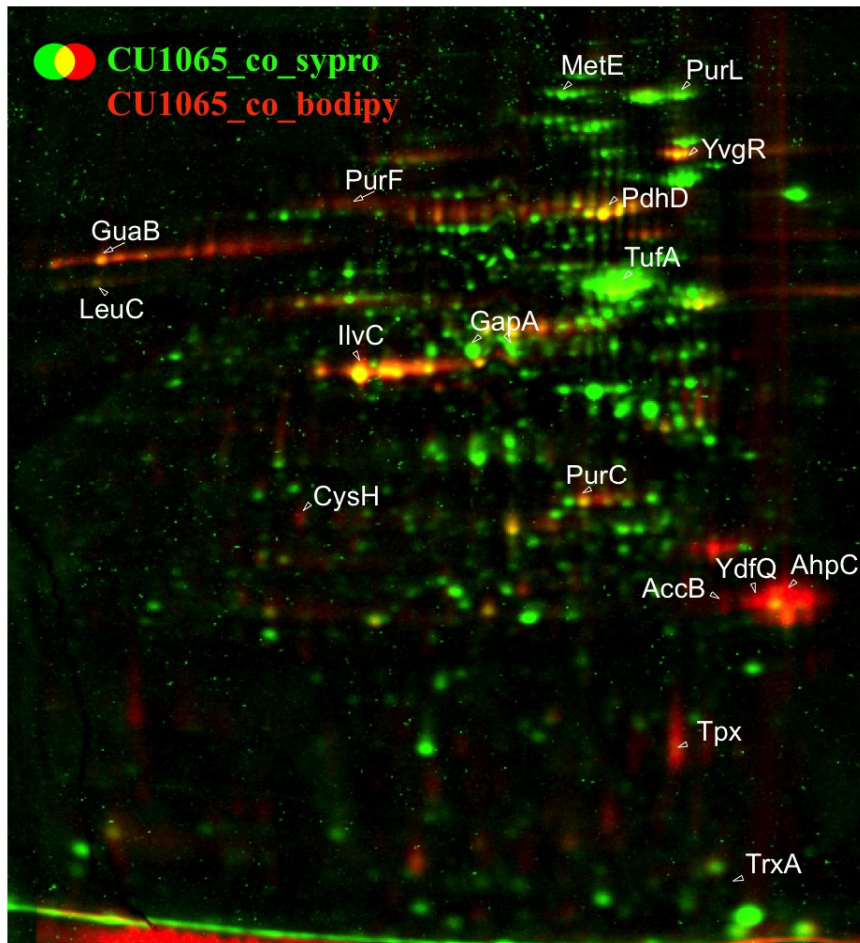

(B)

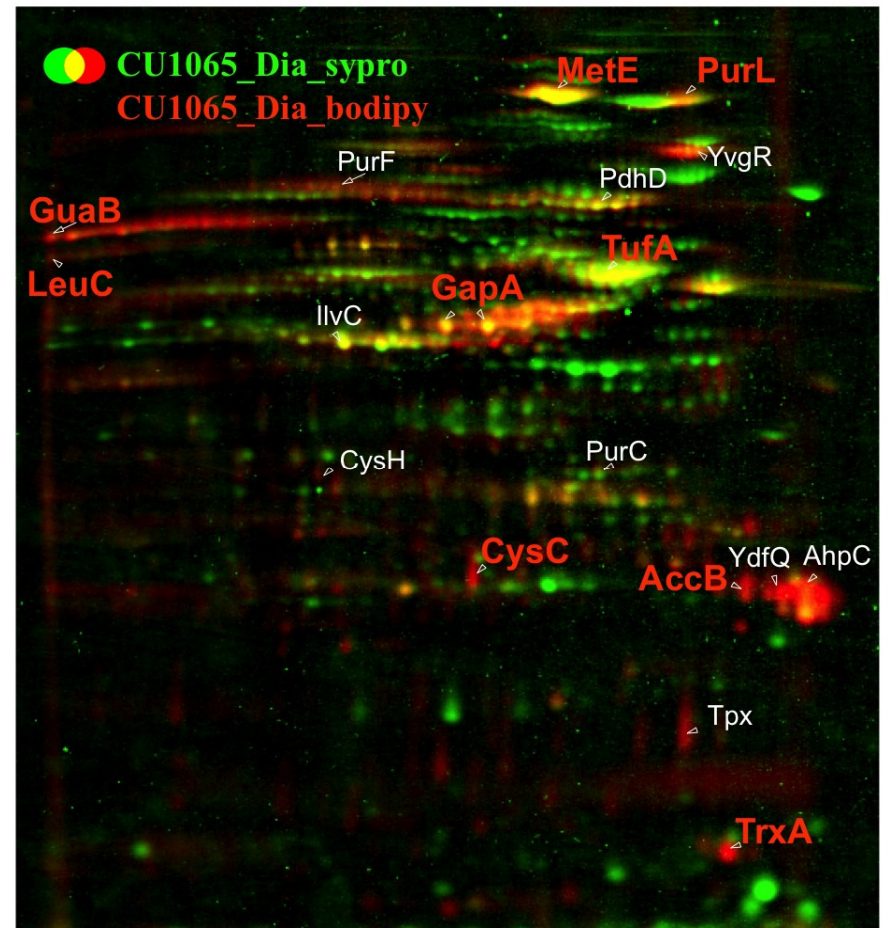

(C)

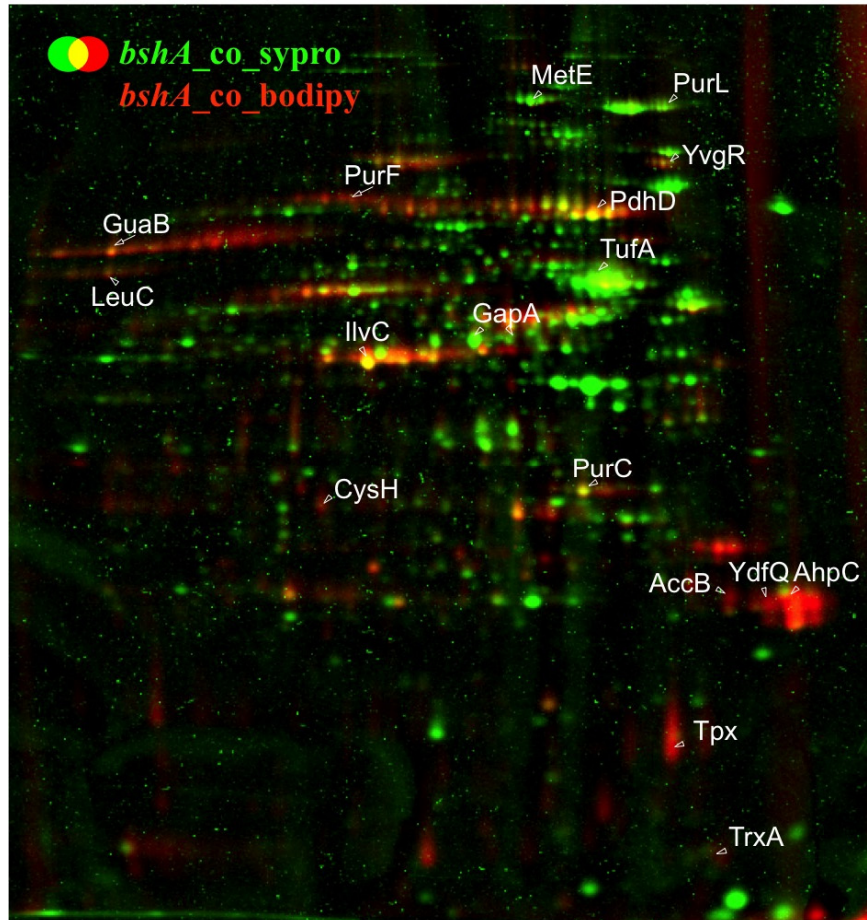

(D)

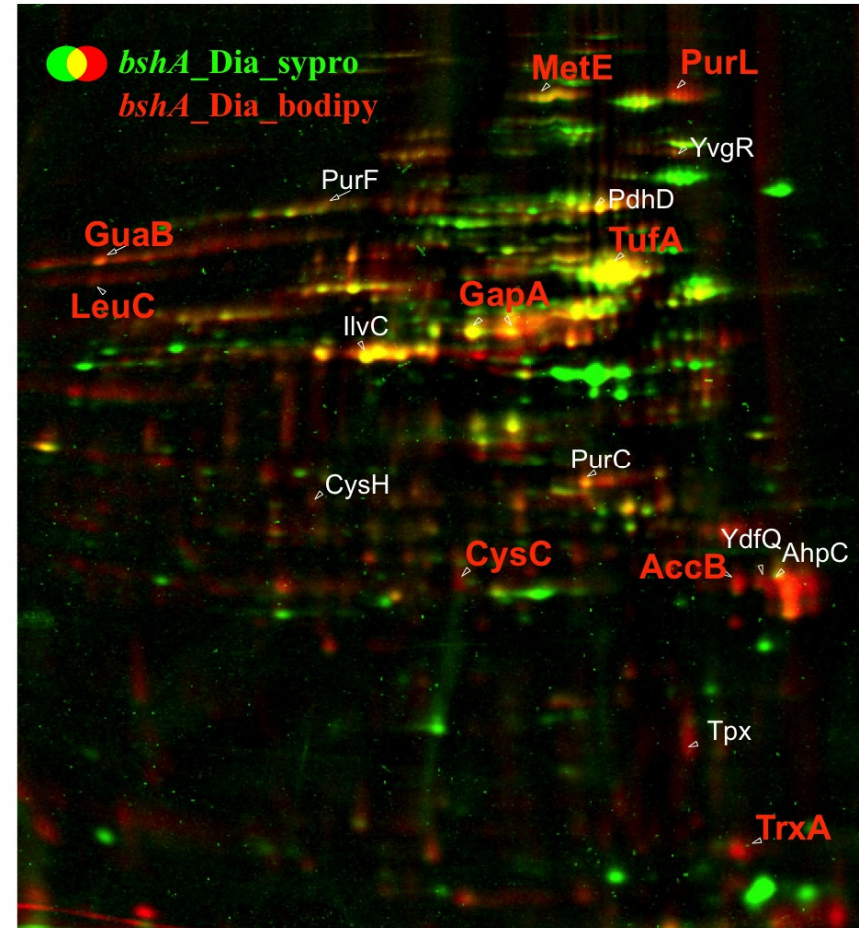

(E)

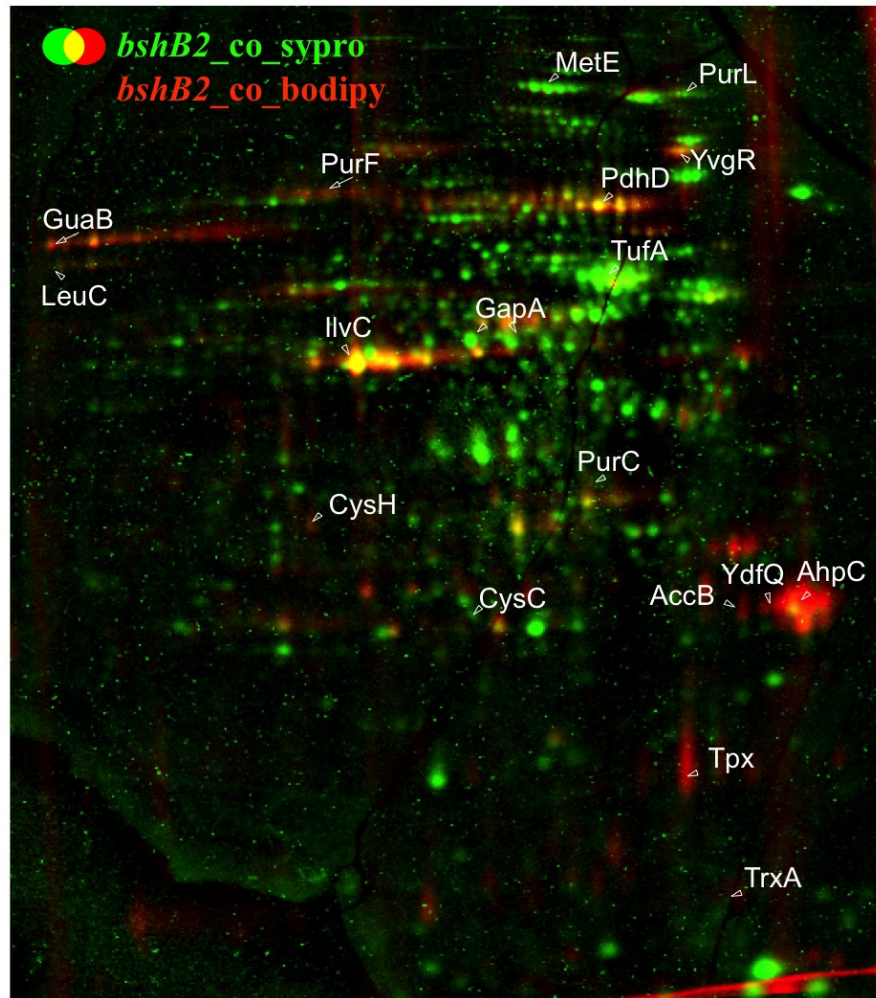

(F)

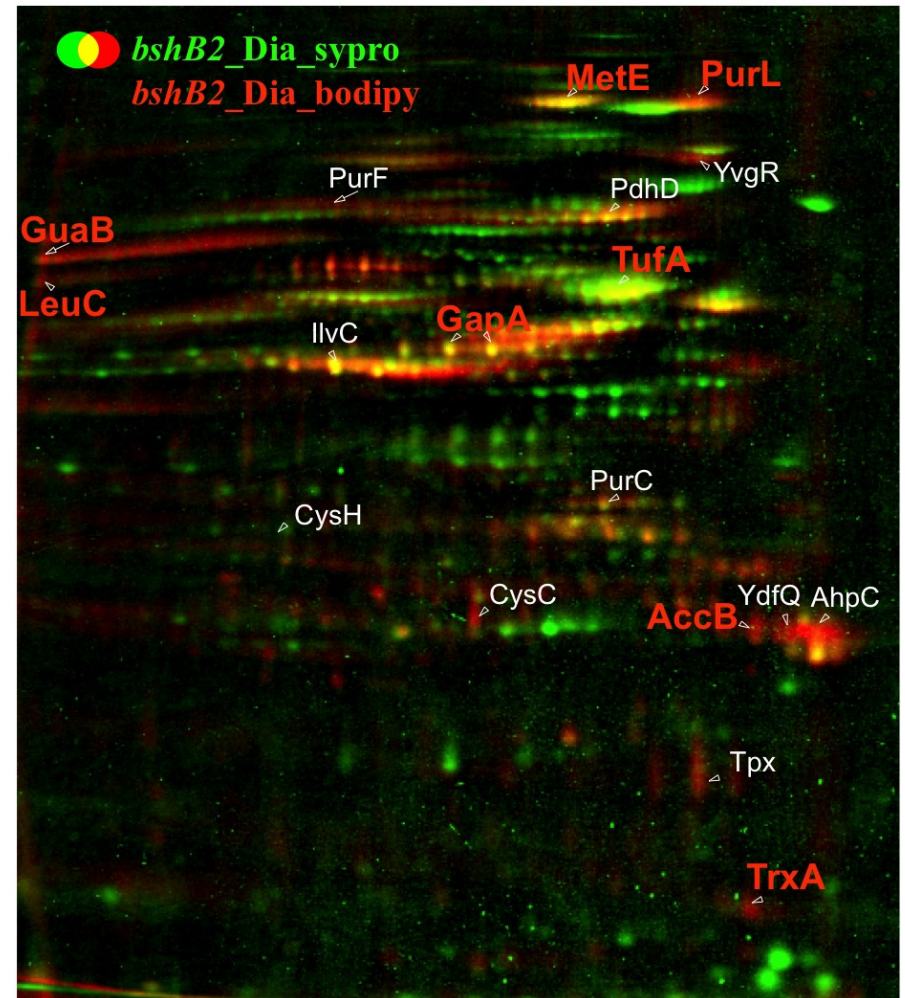

(G)

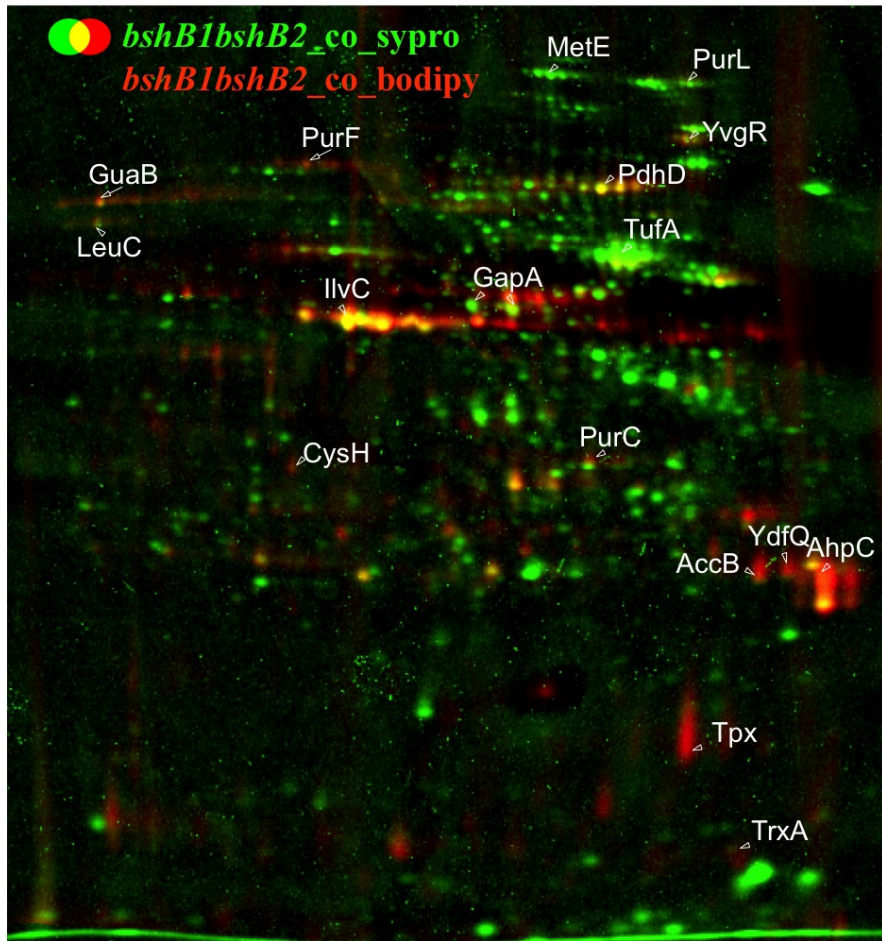

(H)

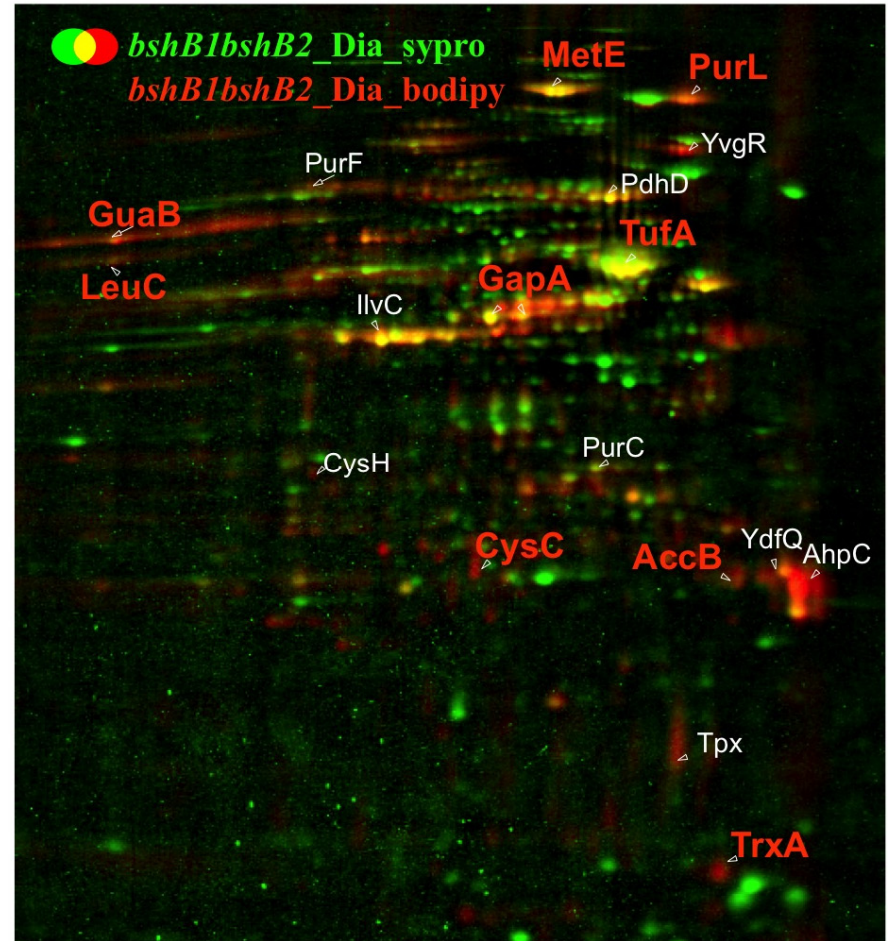

Supplement: 1000928107_sfig04.pdf [file 1000928107_sfig04.pdf]
